# Supplementary material for: Low Testosterone and Semen Parameters in Male Partners of Infertile Couples Undergoing IVF with a Total Sperm Count Greater than 5 Million
Source: PubMed Central journal article supplement (PMC7761260; doi:10.3390/jcm9123824), 2020-11-26
Supplement: jcm-09-03824-s001.pdf [file jcm-09-03824-s001.pdf]

**Supplementary Table I. Comparison of patient frequencies with Oligospermia, Oligoasthenospermia, Oligoasthenoteratospermia between the two groups**

|                                  | TT<264 ng/dL<br>( <i>n</i> =116) | TT≥264 ng/dL<br>( <i>n</i> =737) | P-value            |
|----------------------------------|----------------------------------|----------------------------------|--------------------|
| <b>Oligospermia</b>              | 97 (83.62%)                      | 632 (85.75%)                     | 0.54 <sup>b</sup>  |
| <b>Oligoasthenospermia</b>       | 9 (7.76%)                        | 46 (6.24%)                       | 0.53 <sup>b</sup>  |
| <b>Oligoasthenoteratospermia</b> | 0 (0%)                           | 5 (0.68%)                        | >0.99 <sup>c</sup> |

Values are expressed as Number (*n*) and Percentage (%).

P value were calculated using <sup>b</sup> Chi-Squared test and <sup>c</sup> Fisher exact test
